# Supplementary material for: Luminescence Properties of Epitaxial Cu2O Thin Films Electrodeposited on Metallic Substrates and Cu2O Single Crystals
Source: MDPI journal article supplement (doi:10.3390/ma16124349), 2023-06-13
Supplement: s1 [file s1]

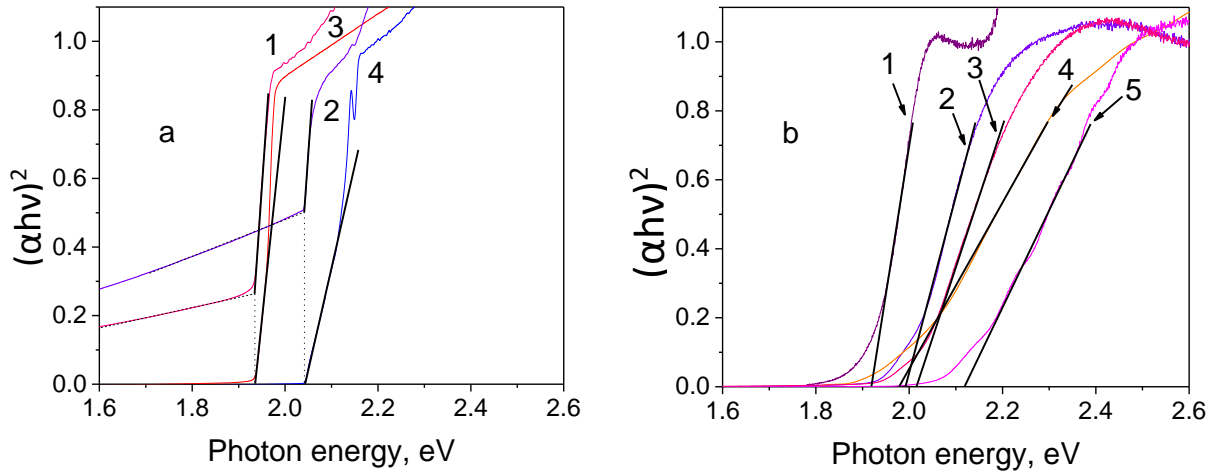

**Figure S1.** Tauc plot for (a)  $\text{Cu}_2\text{O}$  single crystals: 1 – SC (111) at RT, 2 – SC (111) at 10K, 3 – SC (100) at RT, 4 – SC (100) at 10 K; (b)  $\text{Cu}_2\text{O}$  thin films at RT: 1 – 111, 2 – 13, 3 – 40, 4 – 30, 5 – 39. SC (111) has an inclined ground level.

From the Tauc plot, the band gap value was determined as an intersection point of the tangent to a curve with an abscissa, or with an inclined ground level.

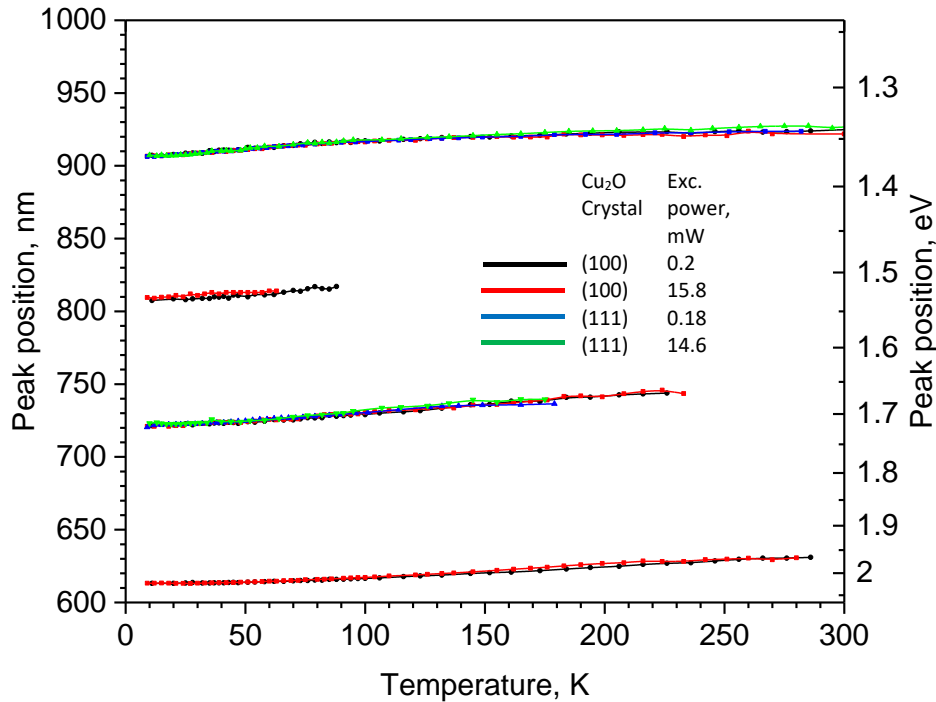

**Figure S2.** Peak position of the main emission bands of  $\text{Cu}_2\text{O}$  single crystals SC(100) and SC(111) under laser excitation power 0.2 and 15 mW in 10-300 K temperature range. Samples and excitation power are shown in the legend.

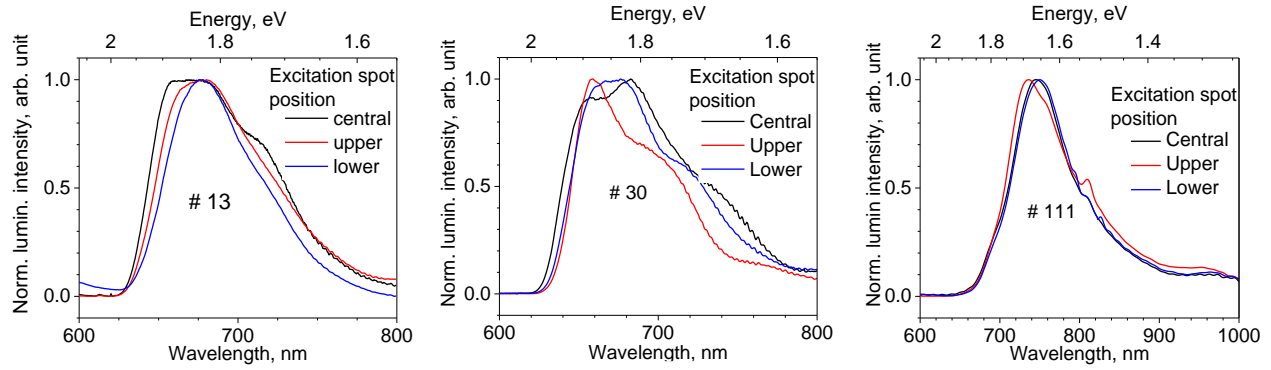

**Figure S3.** PL spectra of Cu<sub>2</sub>O thin films 13, 30 and 111 at temperature 10 K, taken at different excitation spots.

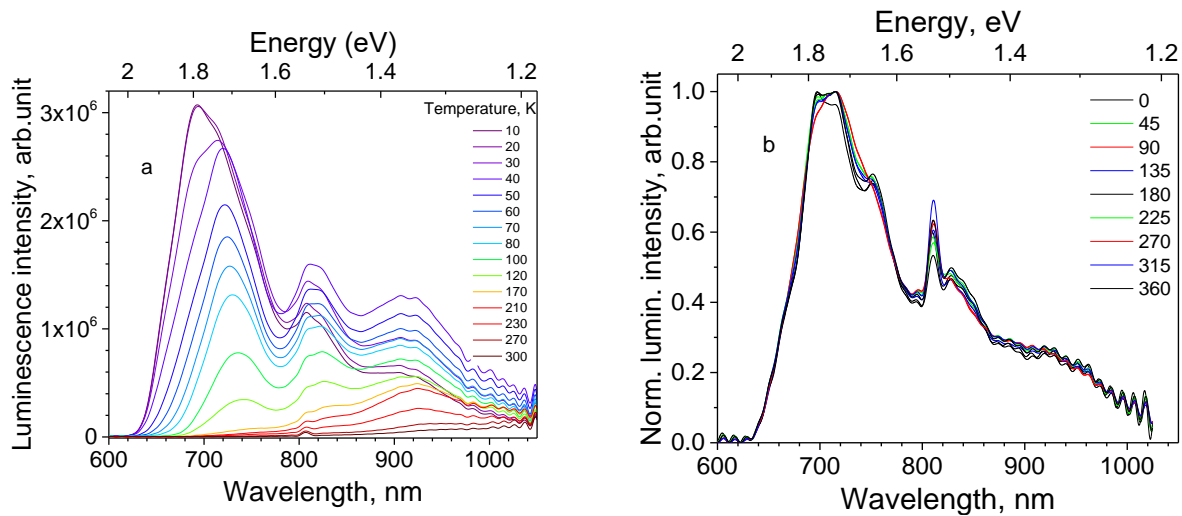

**Figure S4.** Spectral properties of Cu<sub>2</sub>O thin film on Ag polycrystalline substrate (sample 39) under 532 nm laser excitation: (a) Thermal evolution of PL spectra (temperature values are shown on the graph); (b) polarized PL spectra at different angular positions of the analyzer at 10 K (angular degrees are shown on the graph).

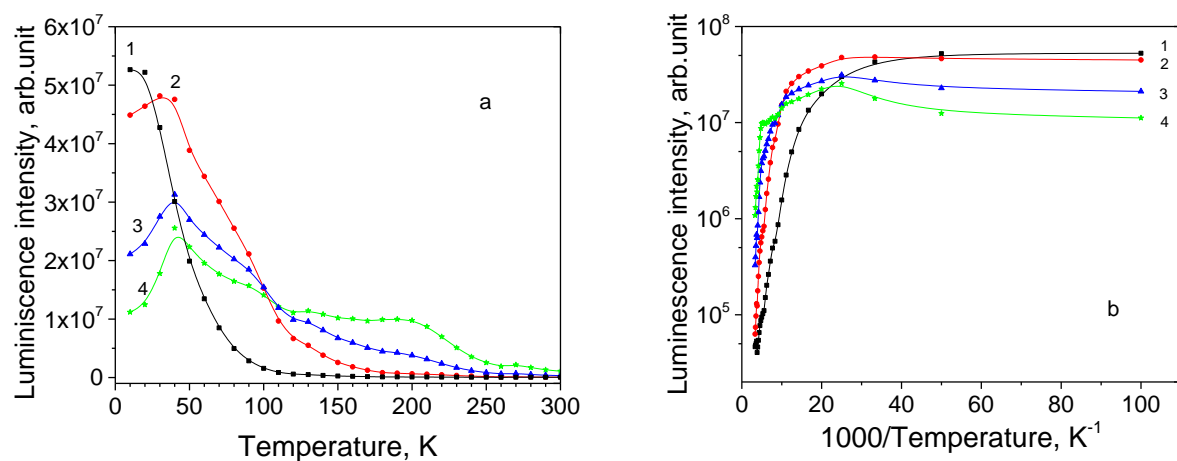

**Figure S5.** Thermal evolution of PL subbands for thin film sample 39: (a) PL intensity; (b) Arrhenius plot: 1 - 680 nm , 2 – 735 nm, 3 – 820 nm, 4 - 920 nm.

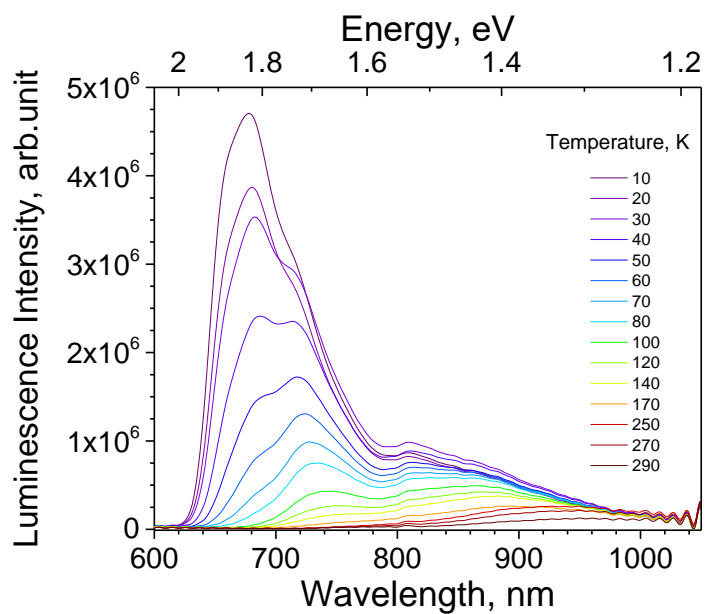

**Figure S6.** Thermal evolution of PL spectrum of Cu<sub>2</sub>O thin film on Ag polycrystalline substrate (sample 40) under 532 nm laser excitation.

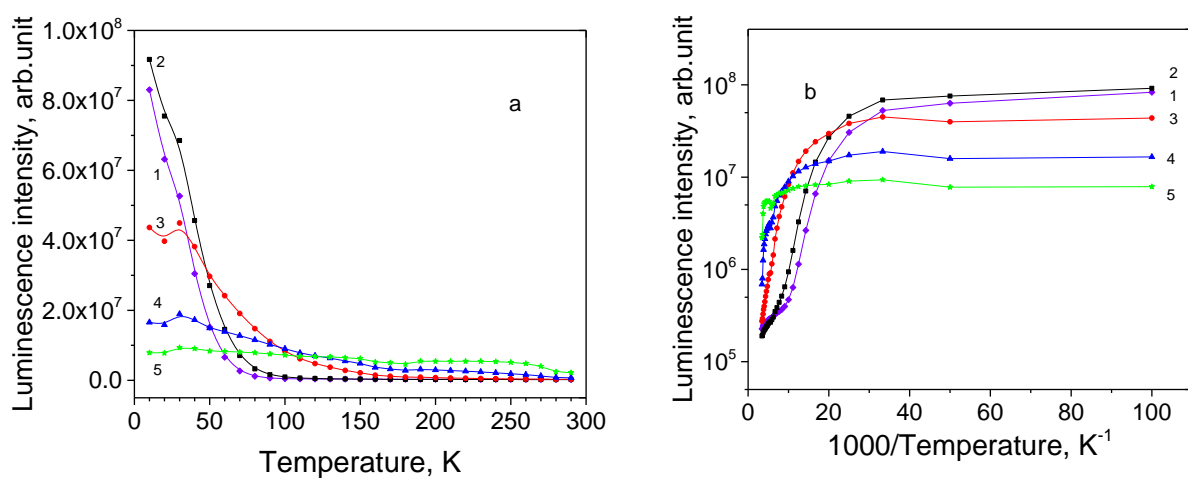

**Figure S7.** Thermal evolution of PL subbands for thin film sample 40: (a) PL intensity; (b) Arrhenius plot: 1 – 660 nm; 2 - 680 nm , 3 – 735 nm, 4– 820 nm, 5 - 920 nm.
